# Supplementary material for: Influence of ecological traits on spatio-temporal dynamics of an elasmobranch community in a heavily exploited basin
Source: Springer Nature journal article supplement (doi:10.1038/s41598-023-36038-y), 2023-06-13
Supplement: MOESM1 [file 41598_2023_36038_MOESM1_ESM.pdf]

# Supplementary Information

## Influence of ecological traits on spatio-temporal dynamics of an elasmobranch community in a heavily exploited basin

Federico Maioli<sup>1,\*</sup>, Benjamin Weigel<sup>2,3</sup>, Elettra Chiarabelli<sup>1,4,5</sup>, Chiara Manfredi<sup>1</sup>, Alessandra Anibaldi<sup>1,4</sup>, Igor Isailovic<sup>6</sup>, Nedo Vrgoc<sup>6</sup>, and Michele Casini<sup>1,7,\*</sup>

<sup>1</sup>University of Bologna, Department of Biological, Geological, and Environmental Sciences, Laboratory of Marine Biology and Fisheries, Fano, 61032, Italy

<sup>2</sup>University of Helsinki, Faculty of Biological and Environmental Sciences, Organismal and Evolutionary Biology Research Programme, Research Centre for Ecological Change, Helsinki, 00100, Finland

<sup>3</sup>INRAE, EABX, Cestas, 33612, France

<sup>4</sup>CoNISMa, Rome, 00196, Italy

<sup>5</sup>University of Trieste, Department of Life Sciences, Trieste, 34127, Italy

<sup>6</sup>Institute of Oceanography and Fisheries, Split, 21000, Croatia

<sup>7</sup>Swedish University of Agricultural Sciences, Department of Aquatic Resources, Institute of Marine Research, Lysekil, 45330, Sweden

\*Corresponding authors: f.maioli@unibo.it; m.casini@unibo.it; [michele.casini@slu.se](mailto:michele.casini@slu.se)

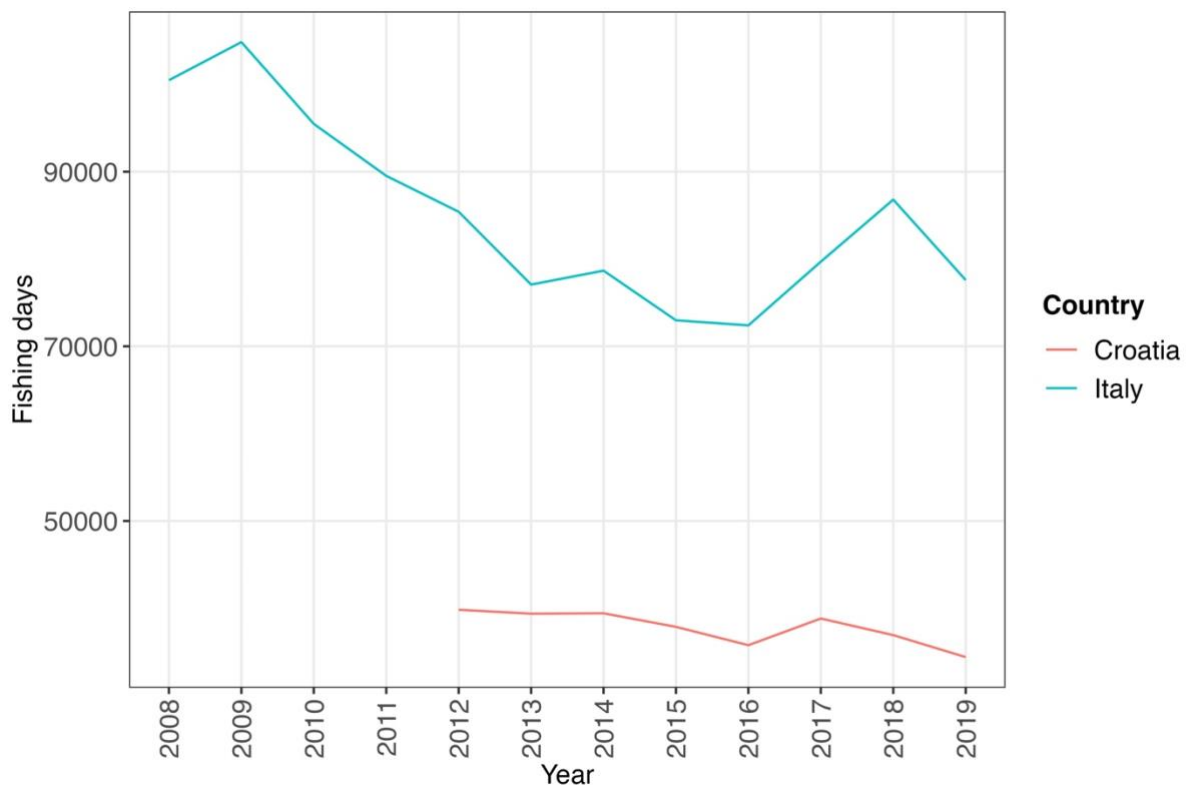

**Figure S1. Trend in fishing effort in the North-Central Adriatic Sea from 2008 to 2019.** Data are obtained from the Scientific, Technical and Economic Committee for Fisheries (STECF; <https://stecf.jrc.ec.europa.eu/reports/economic>). The data are filtered for beam trawlers (TBB), and demersal trawlers (DTS). Fishing effort is expressed as the number of days fishing vessels spent fishing.

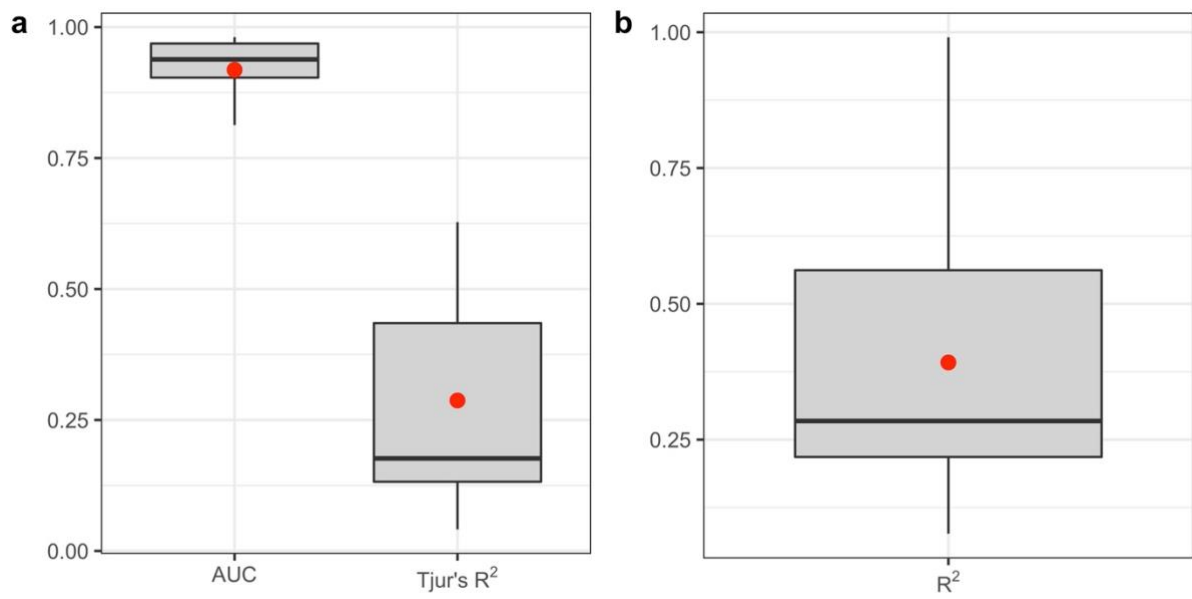

**Figure S2. Boxplots showing the explanatory power.** The panels show the results (a) for the presence-absence (PA) model and (b) for the conditional abundance (ABU) model. Data point represents species-specific values. Red dots represent mean values.

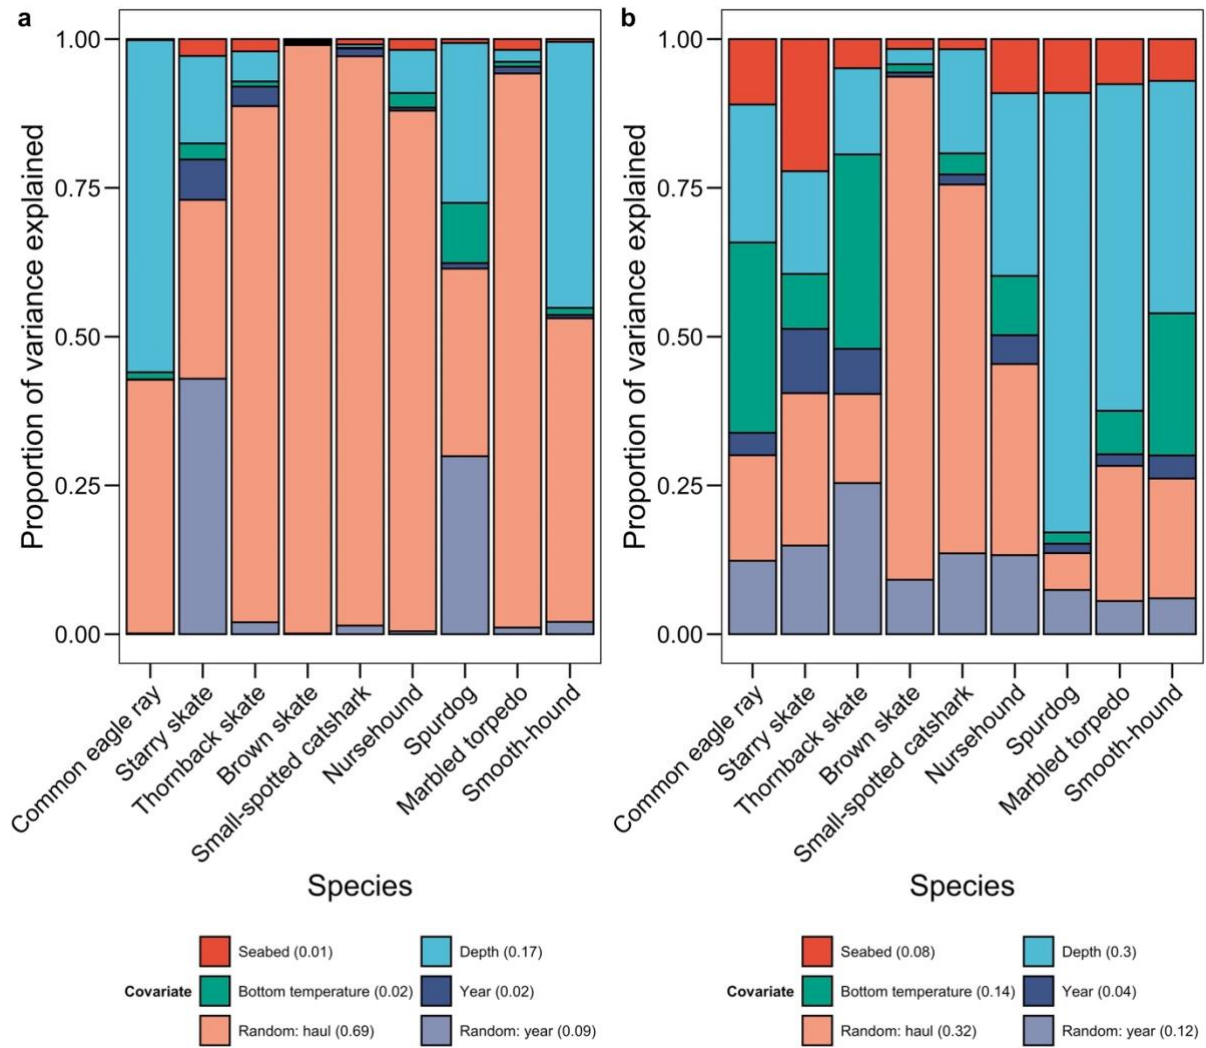

**Figure S3. Variance partitioning among the explanatory variables included in the models.** The panels show the results (a) for the presence-absence model and (b) for the conditional abundance model. The explanatory power is measured by Tjur  $R^2$  for the presence-absence (PA) model and  $R^2$  for the conditional abundance (ABU) model. The mean variance proportions averaged over the species are reported in brackets alongside the legend. ‘Random: haul’ indicates haul-level spatial random effects, while ‘Random: year’ represents temporal random effects.

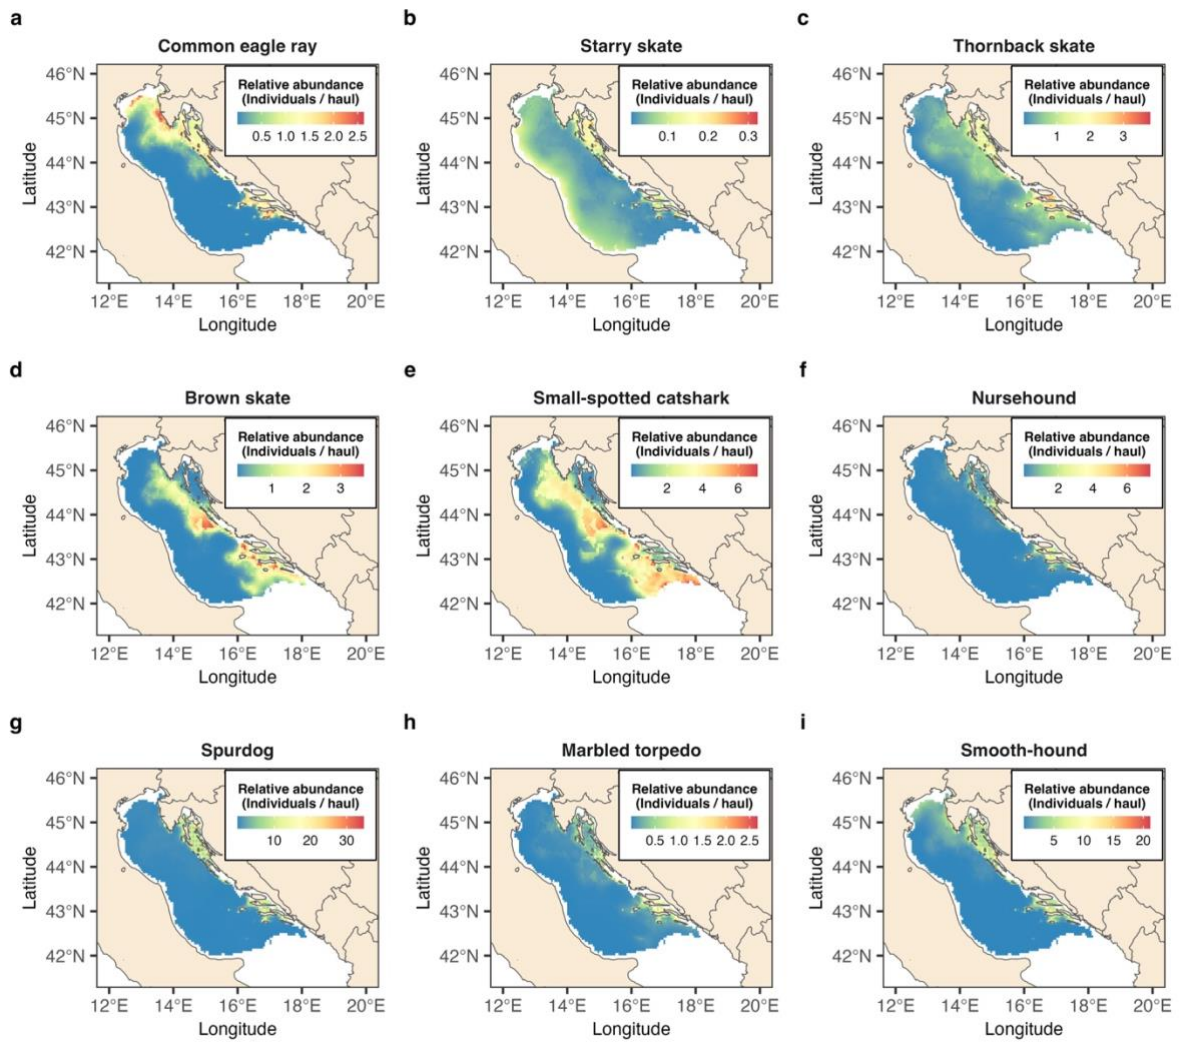

**Figure S4. Predicted species mean abundance across the study area.** Predictions refer to the year 2019. In the predictions, the swept area value is fixed to the mean of the trawl hauls used in the study (i.e., 0.047 km<sup>2</sup>).

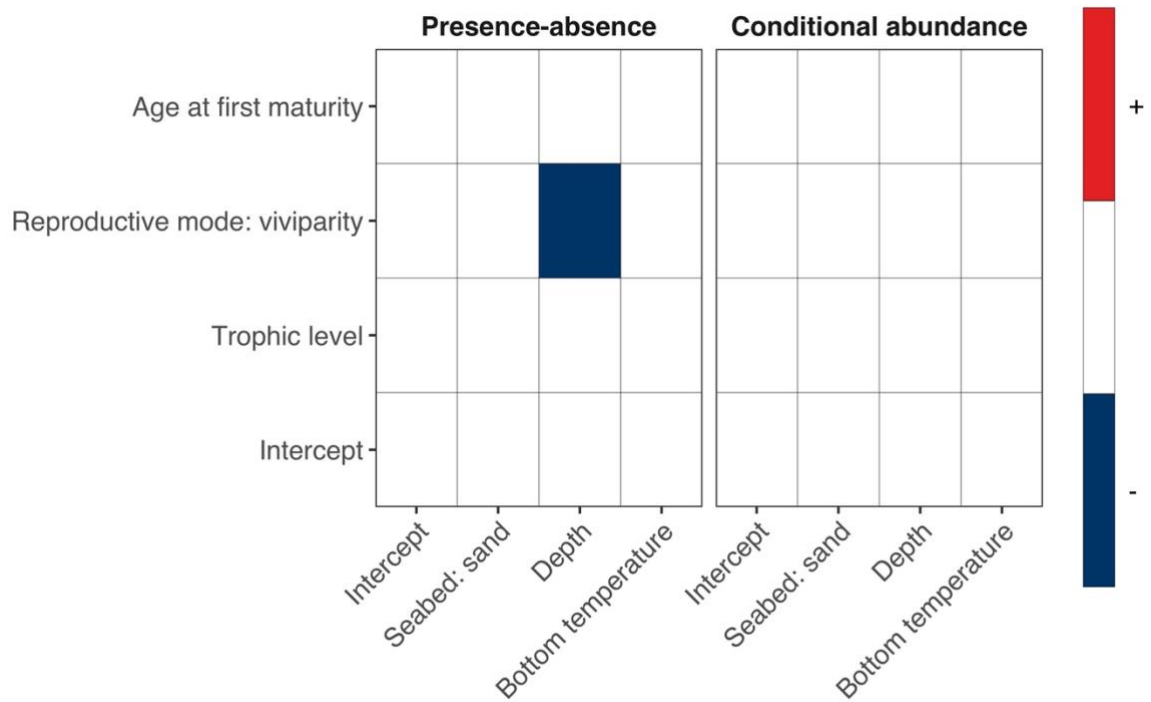

**Figure S5. Heatmap of the estimated  $\gamma$  parameters (regression slopes) which link species traits to species niches.** The left panel represents the presence-absence (PA) model while the right panel the conditional abundance (ABU) model. Blue color indicates parameters that are estimated to be negative with at least 95% posterior probability, while responses that did not gain strong statistical support are shown in white. No parameter is estimated to be positive with at least 95% posterior probability.

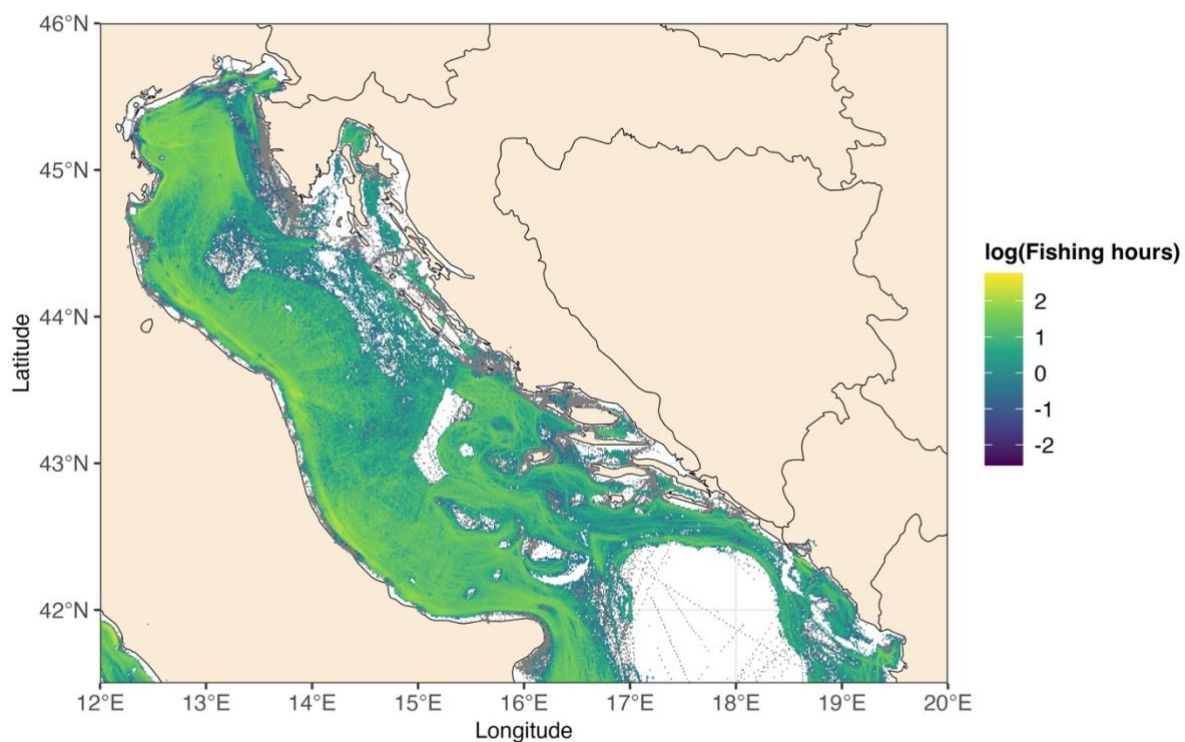

**Figure S6. Map showing the estimated spatial distribution of fishing effort in the North-Central Adriatic Sea during the year 2019.** Data are obtained from the Automatic Identification System (AIS) and analyzed using Global Fishing Watch (<https://globalfishingwatch.org/>). The map specifically shows trawlers as the gear type used. Fishing effort is expressed in fishing hours.

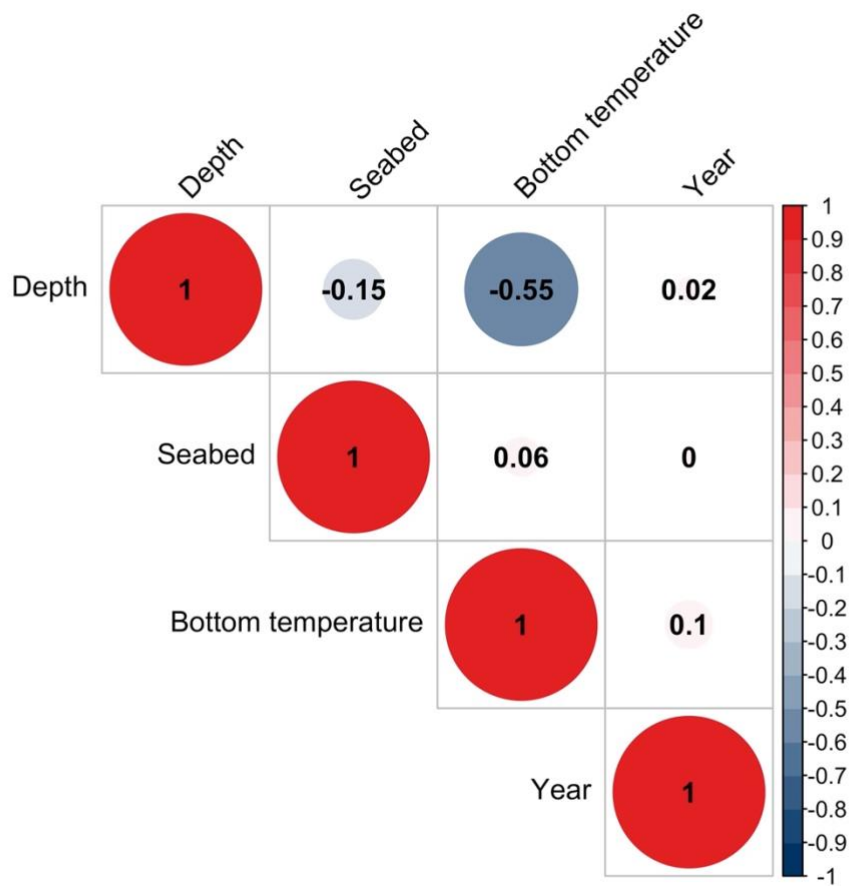

**Figure S7. Pearson pairwise correlation coefficients for the environmental covariates included in the analysis.** Red (blue) colour indicates positive (negative) coefficients, which are reported inside the circles.

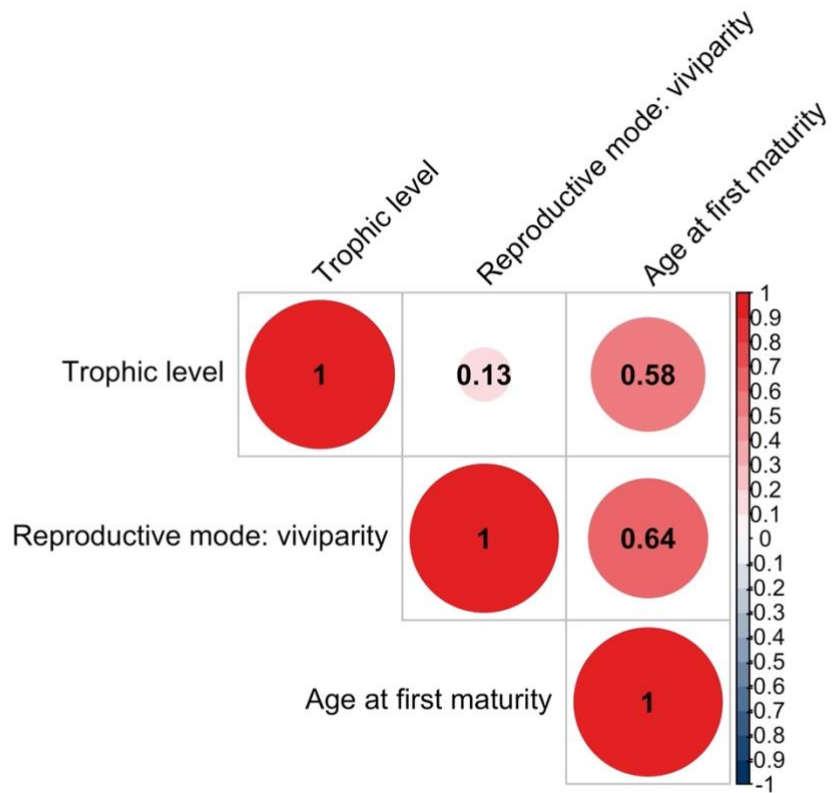

**Figure S8. Pearson pairwise correlation coefficients for the traits included in the analysis.** Red colour indicates positive coefficients, which are reported inside the circles.



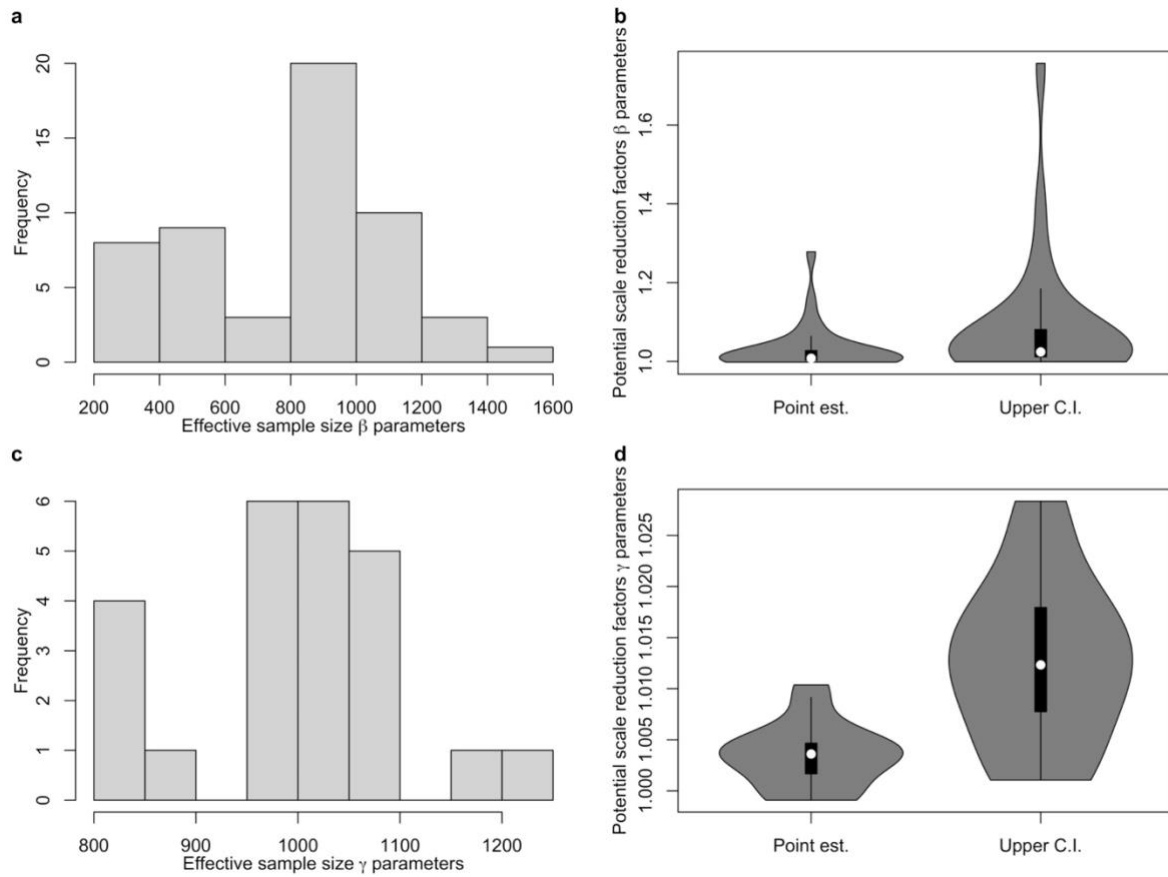

**Figure S9. Model diagnostics for the presence-absence (PA) model.** The panels correspond (a-b) to the  $\beta$  parameters and (c-d) to the  $\gamma$  parameters. The panels on the left measure MCMC in terms of the effective sample size and the panels on the right in terms of the potential scale reduction factor.

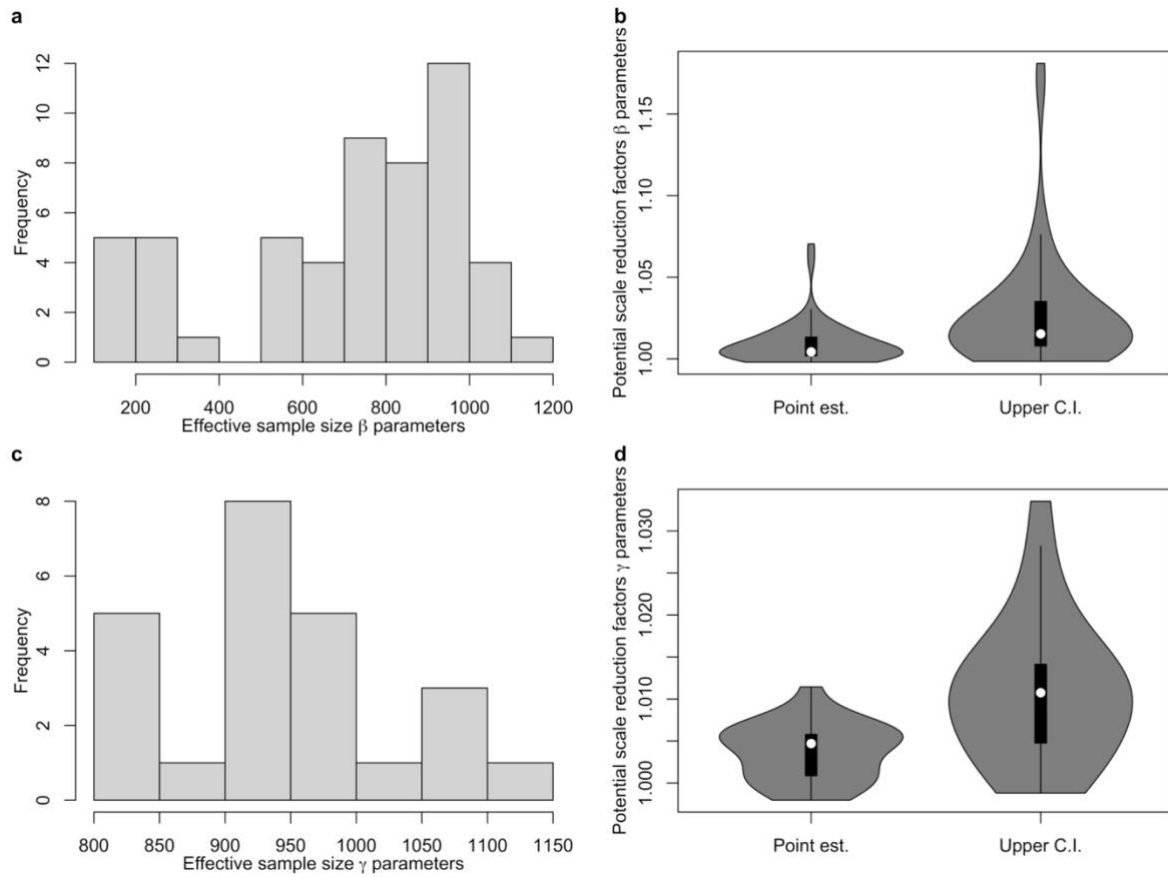

**Figure S10. Model diagnostics for the conditional abundance (ABU) model.** The panels correspond (a-b) to the  $\beta$  parameters and (c-d) to the  $\gamma$  parameters. The panels on the left measure MCMC in terms of the effective sample size and the panels on the right in terms of the potential scale reduction factor.

## Models' equations

We modeled the occurrence and abundance of each species (denoted as  $j$ ) in each sampling unit (denoted as  $i$ ) using a generalised linear model

$$y_{ij} \sim D(L_{ij}, \sigma_j^2) \quad (1)$$

where  $D$  is the statistical distribution (i.e., probit for the presence-absence model and normal for the conditional abundance),  $L_{ij}$  is the linear predictor, and  $\sigma_j^2$  is the variance term (which is excluded for the probit model).

The linear predictor  $L_{ij}$  is modeled as the sum of fixed and random effects

$$L_{ij} = L_{ij}^F + L_{ij}^R \quad (2)$$

The fixed effects were modeled as a regression

$$L_{ij}^F = \sum_k x_{ik} \beta_{jk} \quad (3)$$

Here,  $x_{ik}$  represents the covariate  $k$  measured at site  $i$ , and  $\beta_{jk}$  represents the response of species  $j$  to covariate  $k$ , where  $x_{i1} = 1$  denotes the intercept.

The species' response to covariates is assumed to follow a multivariate normal distribution

$$\beta_{..} \sim N(\mu_{..}, V \otimes [\rho C + (1 - \rho)I]) \quad (4)$$

Here,  $\beta_{..}$  denotes the vector of regression coefficients for all species' response to the covariates, which can be interpreted as species environmental niches. The symbol  $\otimes$  denotes the Kronecker product, and  $0 \leq \rho \leq 1$  measures the strength of the phylogenetic signal.

The expected niche  $\mu_j$  models the influence of species-specific traits on species' responses, with

$$\mu_{jk} = \sum_l t_{jl} \gamma_{lk} \quad (5)$$

where  $t_{jl}$  is the value of trait  $l$  for species  $j$  (with  $t_{j1} = 1$  denoting the intercept), and  $\gamma_{lk}$  measures the effect of trait  $l$  on the response to covariate  $k$ . In this equation,  $C$  denotes the phylogenetic covariance matrix, and  $I$  denotes the identity matrix. When  $\rho = 0$ , the residual variance is independent among the species, implying that closely related species do not have more similar environmental niches than distantly related ones. When  $\rho$  approaches  $\rho = 1$ , species' environmental niches are fully structured by their phylogeny, with related species having more similar niches than expected by chance, implying niche conservatism.

The random effects are modeled as

$$L_{ij}^R = \sum_{r=1}^{n_f} L_{ij}^{r,R} \quad (6)$$

where  $L_{ij}^{r,R}$  is the linear predictor related to the random effect  $r$ . In this case,  $r = 1$  represents the random effect of haul, and  $r = 2$  represents the random effect of year.

We define “units” as the sampling units at the haul and year level and denote the unit behind sampling unit  $i$  as  $u^r(i)$ . The random effect number  $r$  is then defined as

$$L_{ij}^{r,R} = \sum_{h=1}^{n_f^r} \eta_{u^r(i)h} \lambda_{hj}^r \quad (7)$$

Here, the summation goes over  $n_f^r$ , which are the number of factors included for random effect  $r$ . The  $\eta_{u^r(i)h}$  are the “unit loadings,” and the  $\lambda_{hj}^r$  are the “species loadings”. The unit loadings  $\eta_{u^r(i)h}$  have an exponentially decaying correlation structure, where

$$\eta_{.h}^r \sim N(0, \Sigma) \quad (8)$$

and

$$\sum_{u_1^r u_2^r} = \exp(-d_{u_1^r u_2^r} / \alpha_h^r) \quad (9)$$

Here,  $d_{u_1^r u_2^r}$  is the distance in space or time between the units  $u_1^r$  and  $u_2^r$ , and  $\alpha_h^r$  is the spatial or temporal scale associated with the factor number  $h$  of the random effect  $r$ .
